# Supplementary material for: Bruton’s tyrosine kinase regulates gut immune homeostasis through attenuating Th1 response
Source: PubMed Central journal article supplement (PMC8087775; doi:10.1038/s41419-021-03702-y), 2021-04-30
Supplement: 41419_2021_3702_MOESM1_ESM.pdf [file 41419_2021_3702_MOESM1_ESM.pdf]

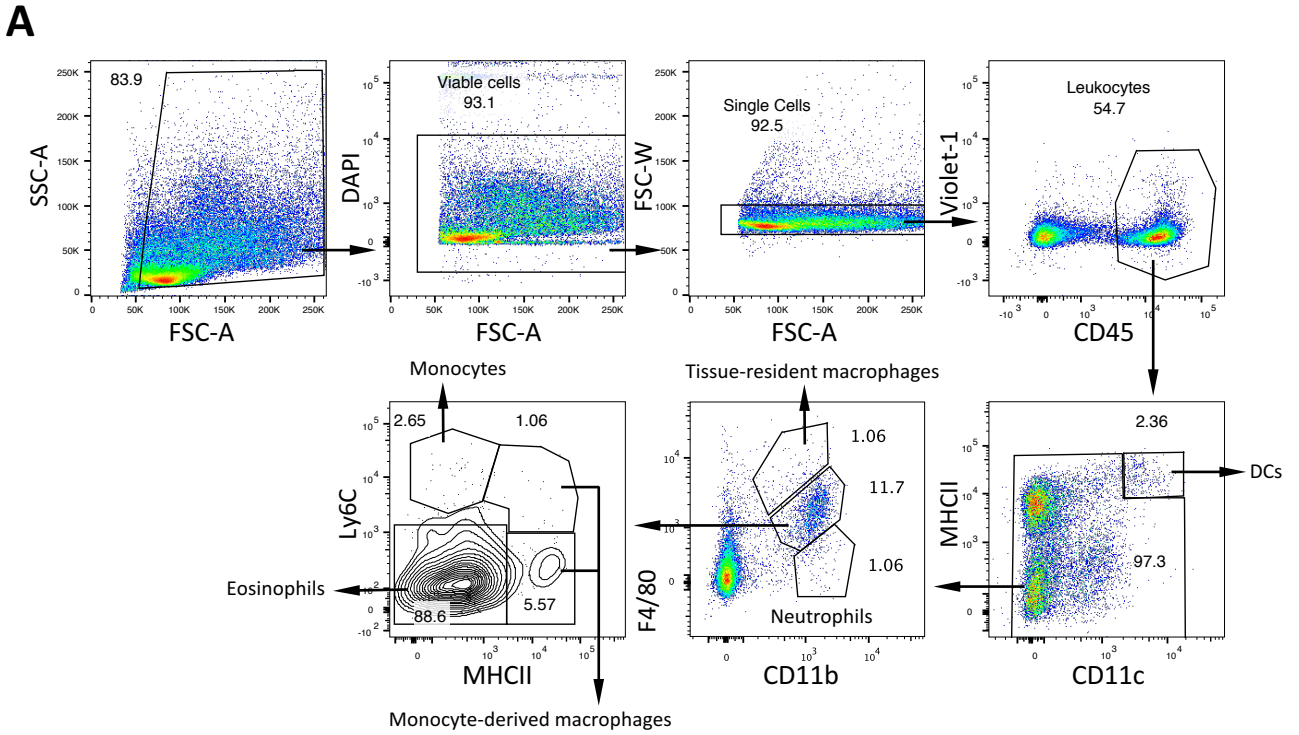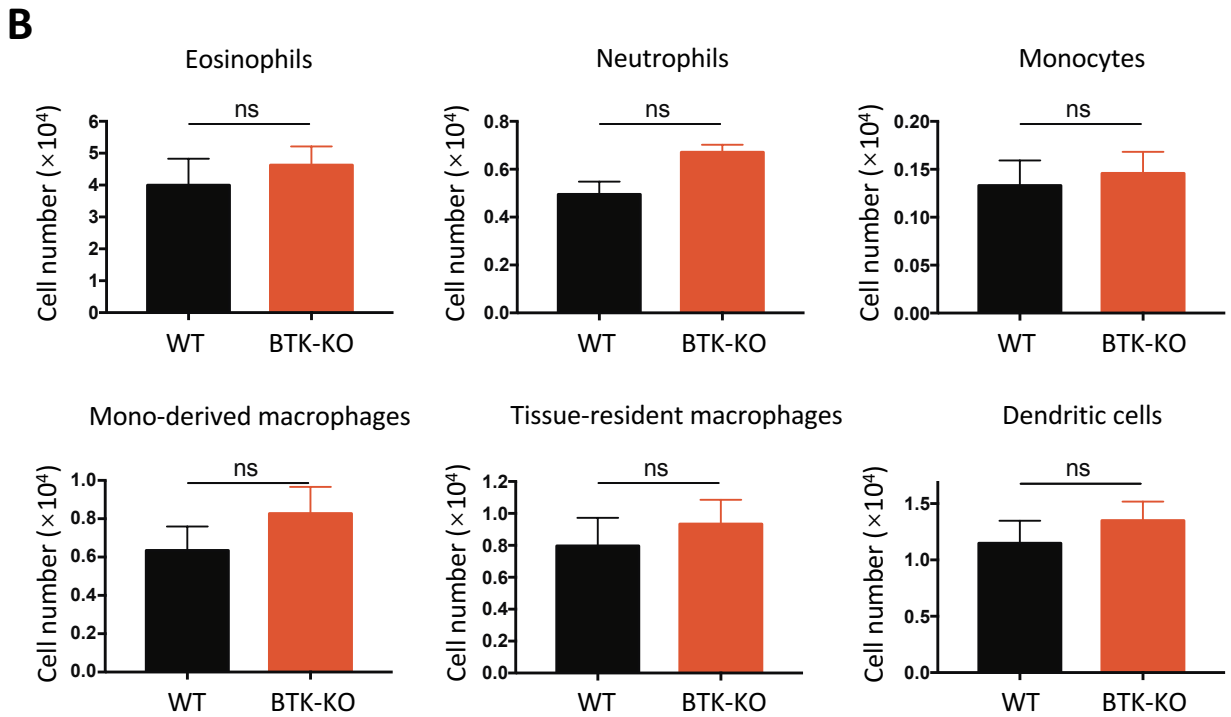

**Supplementary Figure 1. Gating strategy and numbers of innate immune cell populations in the colon LP of WT and BTK-KO mice. (A)** Gating strategy used for identifying innate immune cell populations in the mouse colon LP. Numbers shown are the percentage of cells in the indicated gates. **(B)** Numbers of innate immune cells in the colon LP of WT and BTK-KO mice. Data are presented as mean  $\pm$  SEM ( $n = 4$ ). Statistical significance was determined by two-sided independent sample Student's *t* test. ns: not significant.

**Supplementary Table 1. Primers used for quantitative real-time PCR.**

| <b>Target gene</b>             | <b>Primers</b>                |
|--------------------------------|-------------------------------|
| <i>Ifn-<math>\gamma</math></i> | F 5'-GGAAGTGGCAAAGGATGGTGA-3' |
|                                | R 5'-TGTTGCTGATGGCCTGATTGT-3' |
| <i>Il-17a</i>                  | F 5'-CCTGGACTCTCCACCGCAA-3'   |
|                                | R 5'-AGCTTTCCTCCGCATTGAC-3'   |
| <i>Btk</i>                     | F 5'-GAGACCTGGCAGCTCGAAAC-3'  |
|                                | R 5'-CGGACTGGAAACTTGGAGCC-3'  |
| <i>Il-10</i>                   | F 5'-GGCCCAGAAATCAAGGAGCA-3'  |
|                                | R 5'-AGAAATCGATGACAGCGCCTC-3' |
| <i>Il-12b</i>                  | F 5'-GCAGCAAAGCAAGATGTGTCC-3' |
|                                | R 5'-CTGTTTCTCCAGGGGCATCG-3'  |
